# Supplementary material for: Non-Stationary Dynamics of Compound Climate Extremes: A WRF-CMIP6-GAMLSS Framework for Risk Reassessment in Southeastern China
Source: Copernicus journal article supplement (doi:10.5194/egusphere-2025-2438), 2025-06-16
Supplement: Supplementary file 1 [file egusphere-2025-2438-supplement.pdf]

## 1    **Methods**

### 2    S1. Empirical Mode Decomposition (EMD)

3        Empirical Mode Decomposition (EMD) is a data-driven technique used to decompose a signal  
4    into a set of intrinsic mode functions (IMFs) and a residual trend (Huang et al., 1998). It is  
5    particularly suitable for analyzing nonlinear and non-stationary time series data. Many studies have  
6    shown that the residuals of EMD can reflect the deterministic trend of non-stationary sequences (Lee  
7    and Ouarda, 2010; Qian, 2016; Wu et al., 2023). In this study, the EMD is applied to quantify the  
8    deterministic trends in the recurrence hazards of compound extreme events. The formula is as  
9    follows:

$$10 \quad x(t) = \sum_{i=1}^n IMF_i(t) + r_n(t)$$

11     $x(t)$  is the original signal.  $IMF_i(t)$  represents the  $i$ -th intrinsic mode function, which is the result  
12    of the decomposition.  $r_n(t)$  is the residual (a trend or constant component left after the  
13    decomposition). Typically, it is a constant or a slowly varying trend.

## 14    **Results**

15    S1 Assessing the regional applicability of downscaled CMIP6bc based on historical data

16        Although the quality of CMIP6bc has been widely validated across China, a regional  
17    applicability assessment remains necessary. Figure S1 illustrates the spatiotemporal patterns of  
18    precipitation and temperature simulated by the WRF model using different driving datasets.  
19    Compared to observations, both the downscaled ERA5 and CMIP6bc demonstrated satisfactory  
20    performance in reproducing the spatio-temporal distribution characteristics of precipitation and  
21    temperature across the MRB (Figures S1 a–f). Specifically, the ERA5-based simulations outperform  
22    CMIP6bc, particularly for precipitation ( $CC = 0.88$ ,  $PBIAS = 3.79\%$ ) compared to temperature ( $CC$   
23     $= 0.80$ ;  $PBIAS = 4.03\%$ ). However, the models demonstrate consistent underestimations in the  
24    downstream areas and overestimations in the northwestern Wuyi Mountain region. These systematic  
25    biases are likely attributable to orographic effects, with the WRF model consistently underestimating  
26    precipitation in plain areas while overestimating it in high-elevation regions ([Wang et al., 2020](#); [Min  
27    et al., 2021](#)). As shown in Figures S1 (g, h), the results from both driving datasets capture the  
28    observed temporal variations, with temperature simulations showing better agreement than  
29    precipitation. The Taylor diagrams in Figures S1 (i–l) reveal that the WRF model's performance is  
30    comparatively weaker in the downstream sub-basin of the MRB than the other three sub-basins. In  
31    summary, although CMIP6bc underperforms ERA5 due to resolution limitations, it still exhibits  
32    reasonable spatio-temporal consistency with the observations. We conclude that such discrepancies  
33    remain within an acceptable range for subsequent research.

34 **Table**

35 Table S1 Distribution functions in this study.

| Distribution function   | Abbreviation | Number of parameters |
|-------------------------|--------------|----------------------|
| Gamma                   | GA           | 2                    |
| Gumbel                  | GU           | 2                    |
| Inverse Gamma           | IGAMMA       | 2                    |
| Inverse Gaussian        | IG           | 2                    |
| Logistic                | LO           | 2                    |
| Log-Normal              | LOGNO        | 2                    |
| Reverse Gumbel          | RG           | 2                    |
| Weibull                 | WEI3         | 2                    |
| Normal                  | NO           | 2                    |
| Exponential gen. beta 2 | EGB2         | 4                    |
| Johnson's SU repara.    | JSU          | 4                    |
| Johnson's original SU   | JSUo         | 4                    |
| Generalised t           | GT           | 4                    |
| SU                      | SU           | 4                    |
| NET                     | NET          | 4                    |
| Sinh-arcsinh            | SHASH        | 4                    |
| Sinh-arcsinh original   | SHASHo       | 4                    |
| Sinh-arcsinh original 2 | SHASHo2      | 4                    |

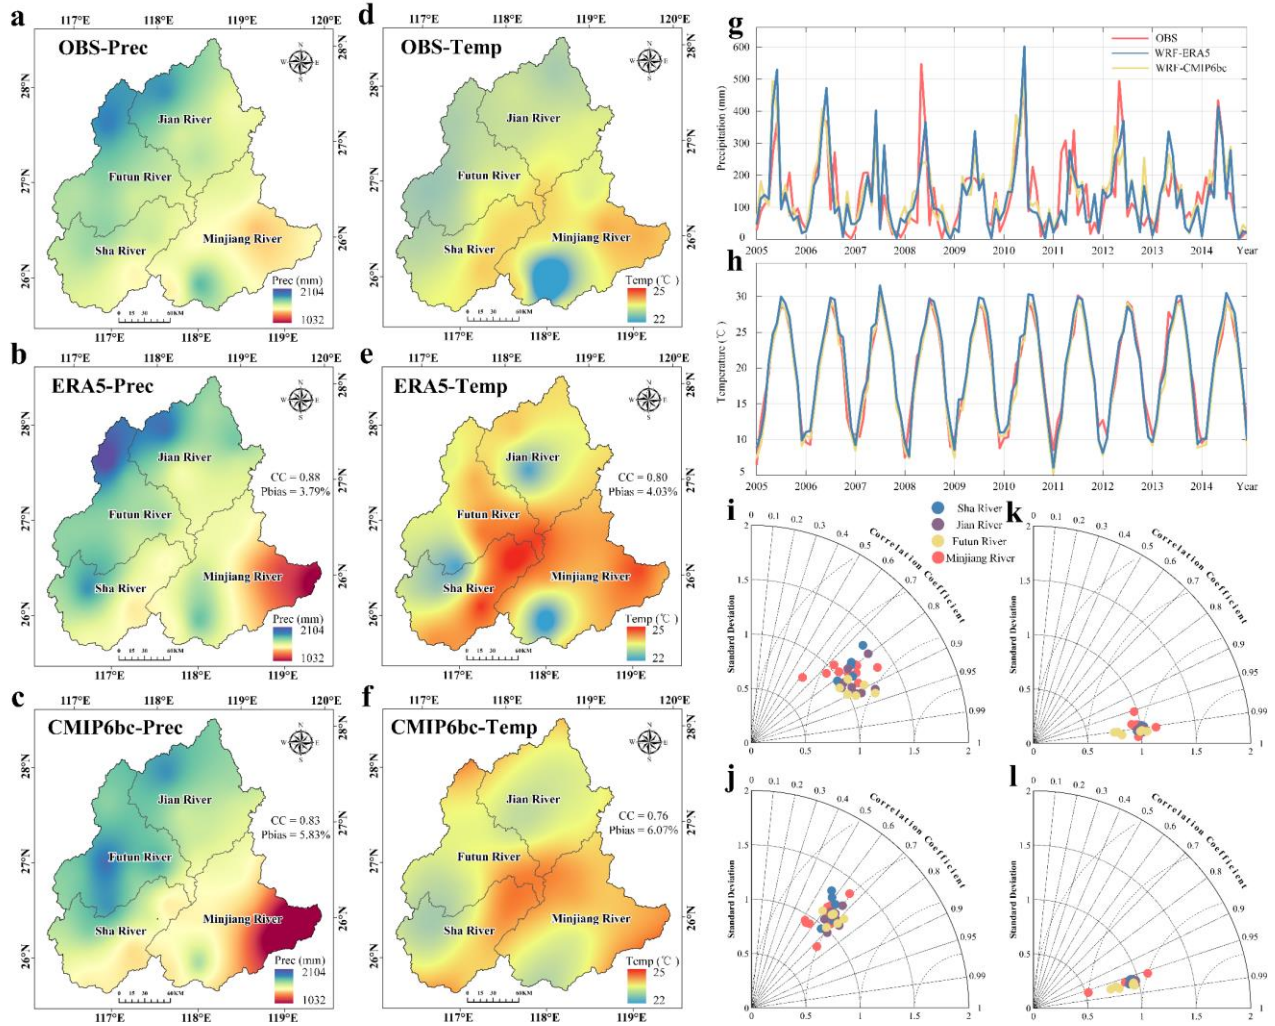

Figure S1. Evaluation of WRF-simulated precipitation and temperature over the MRB (2005-2014). spatial patterns of precipitation (a–c), temperature (d–f). Temporal evolution of precipitation (g) and temperature (h). Panels (i–l) present sub-basin comparisons of precipitation and temperature from ERA5 (i, k) and CMIP6bc (j, l).

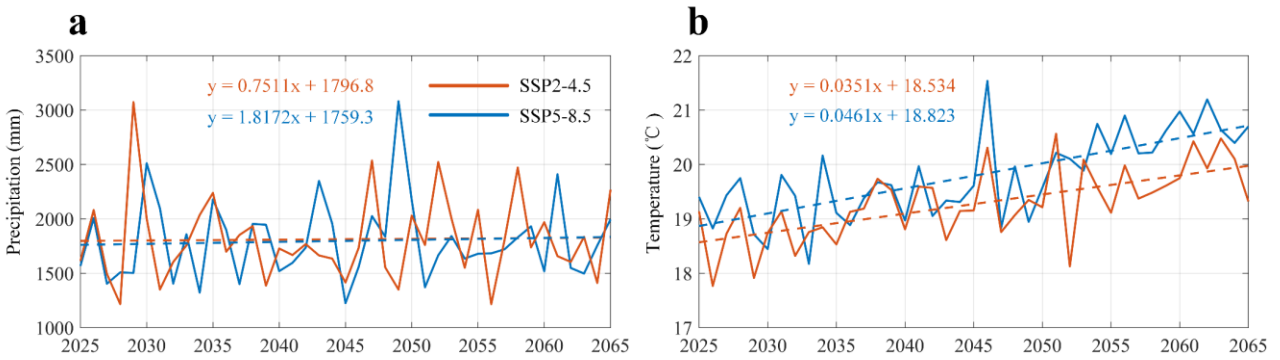

Figure S2 Variation of in annual precipitation (a) and temperature (b) in MRB from 2025 to 2065.

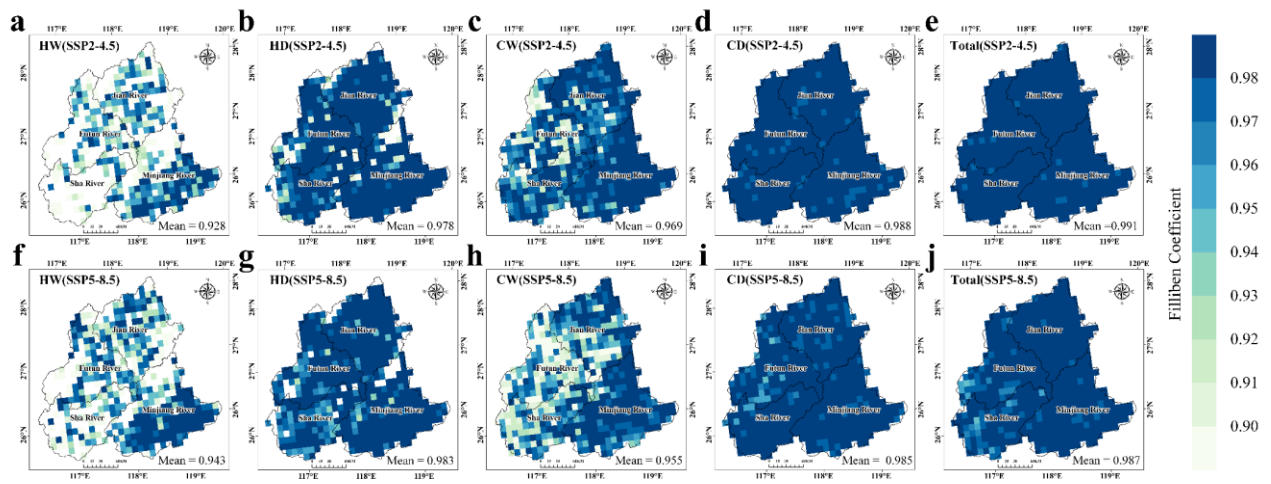

Figure S3 Maps of the Filliben Coefficient for CCEs.



## 20-year return periods

## 50-year return periods

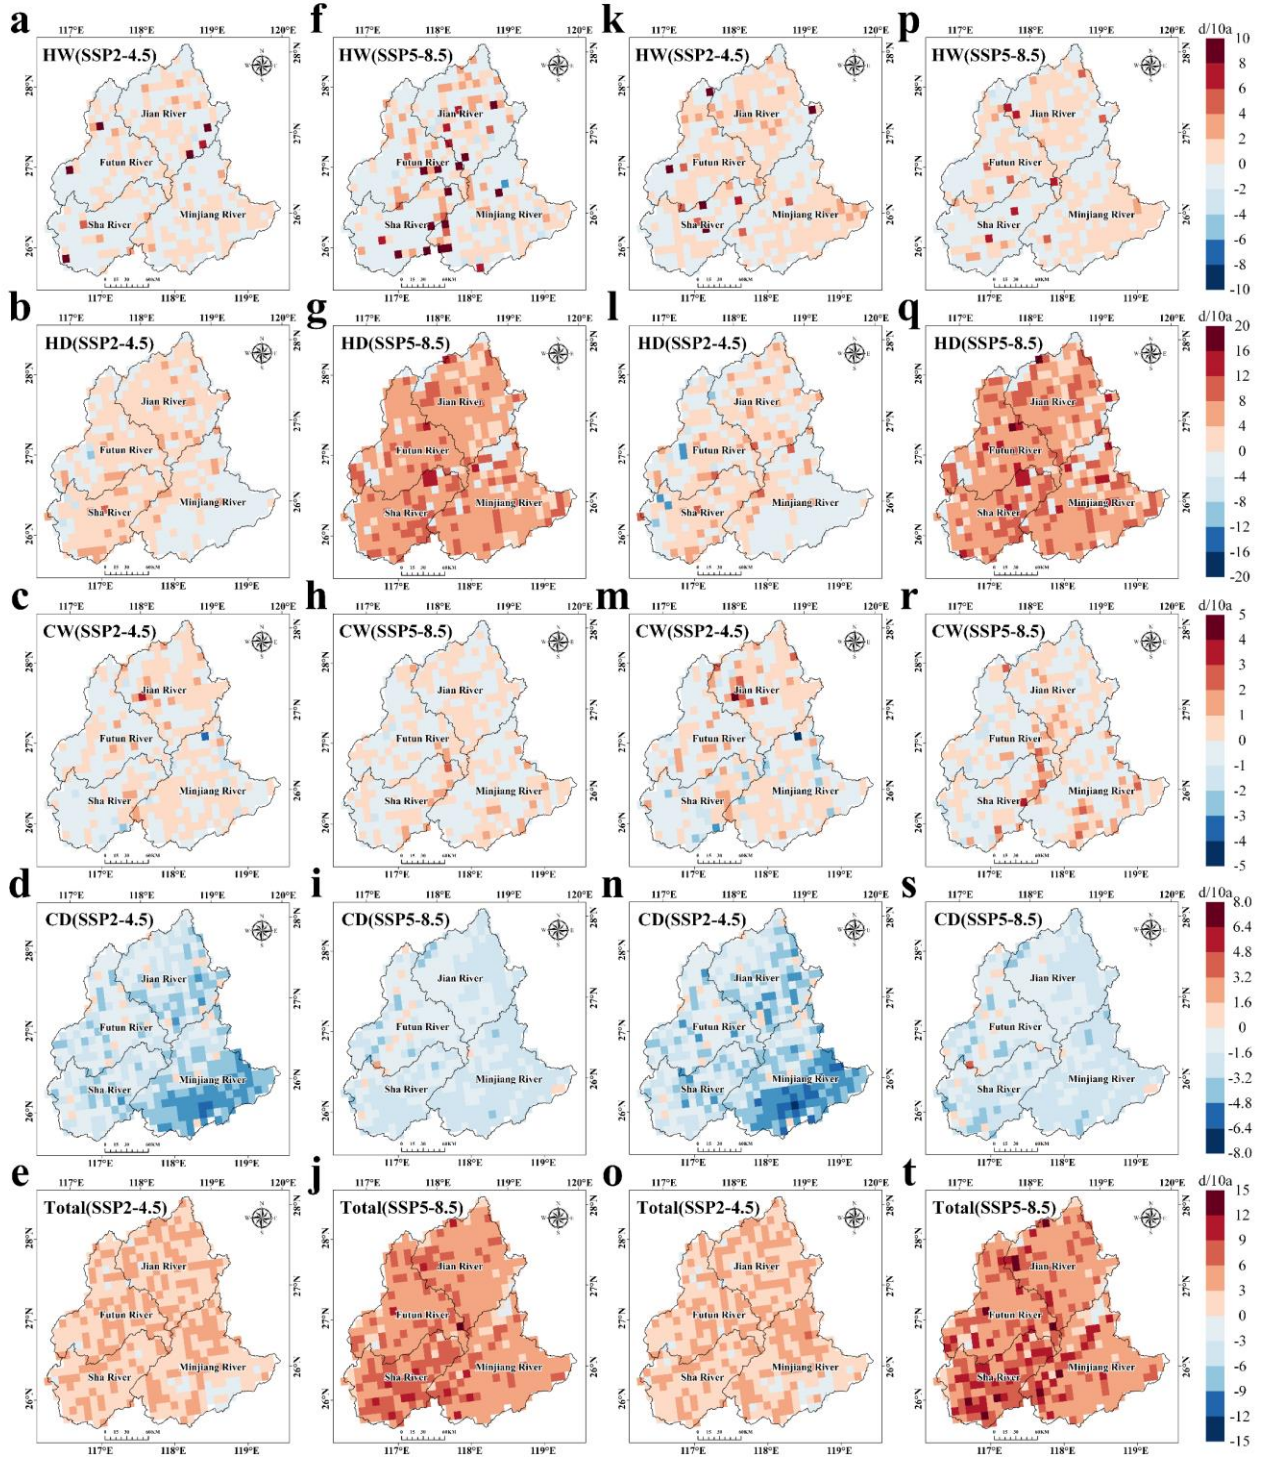

47

48 Figure S4 As in Figure 7 but for 20- and 50- return periods.

## 49    **References**

- 50    Huang, N.E., Shen, Z., Long, S.R., Wu, M.C., Shih, H.H., Zheng, Q., Yen, N.-C., Tung, C.C., Liu,  
51    H.H., 1998. The empirical mode decomposition and the Hilbert spectrum for nonlinear and non-  
52    stationary time series analysis. *Proc. R. Soc. Lond. A.* 454, 903–995.  
53    <https://doi.org/10.1098/rspa.1998.0193>
- 54    Lee, T., Ouarda, T.B.M.J., 2010. Long-term prediction of precipitation and hydrologic extremes with  
55    nonstationary oscillation processes. *J. Geophys. Res.* 115, 2009JD012801.  
56    <https://doi.org/10.1029/2009JD012801>
- 57    Min, Y., Huang, W., Ma, M., Zhang, Y., 2021. Simulations in the topography effects of Tianshan  
58    Mountains on an extreme precipitation event in the Ili River Valley, China. *Atmosphere* 12, 750.  
59    <https://doi.org/10.3390/atmos12060750>
- 60    Qian, C., 2016. On trend estimation and significance testing for non-Gaussian and serially dependent  
61    data: quantifying the urbanization effect on trends in hot extremes in the megacity of Shanghai. *Clim.*  
62    *Dyn.* 47, 329–344. <https://doi.org/10.1007/s00382-015-2838-0>
- 63    Wang, Y., Yang, K., Zhou, X., Chen, D., Lu, H., Ouyang, L., Chen, Y., Lazhu, Wang, B., 2020.  
64    Synergy of orographic drag parameterization and high resolution greatly reduces biases of WRF-  
65    simulated precipitation in central Himalaya. *Clim. Dyn.* 54, 1729–1740.  
66    <https://doi.org/10.1007/s00382-019-05080-w>
- 67    Wu, J., Wang, Z., Dong, J., Cui, X., Tao, S., Chen, X., 2023. Robust Runoff Prediction With  
68    Explainable Artificial Intelligence and Meteorological Variables From Deep Learning Ensemble  
69    Model. *Water Resour. Res.* 59, e2023WR035676. <https://doi.org/10.1029/2023WR035676>
